# Supplementary material for: Electrochemical polymerization of 1,3,4,6-tetraarylpyrrolo[3,2-b]pyrrole-2,5-dione (isoDPP) derivatives
Source: Royal Society of Chemistry journal article supplement (doi:10.1039/c4py01315h), 2014-11-06
Supplement: c4py01315h1.pdf [file c4py01315h1.pdf]

## Supplementary Information

# Electrochemical Polymerization of 1,3,4,6-Tetraarylpyrrolo[3,2-*b*]pyrrole-2,5-dione (IsoDPP) Derivatives

Irina Welterlich and Bernd Tieke\*

### Synthesis of **M1'**

**Figure S1:** <sup>1</sup>H-NMR spectrum of **M1'**

### Synthesis of **P1'**

**Figure S2:** <sup>1</sup>H-NMR spectrum of **P1'**

**Figure S3:** UV/Vis absorption and emission spectra of **P1'** in toluene and as film, and colour of polymer solution in toluene.

**Figure S4:** Crystal structure of **1a**. Molecular conformation in crystal lattice (a) and projection along c-axis (b). The N-, S-, O-, C-, Br-, H-atoms are show in blue, yellow, red, grey, brown and white colour.

**Figure S5:** SEM images of crystalline monomers **M1** and **M2**.

**Table S1:** Crystal data and structure refinement of **1a**.

## Synthesis of M1'

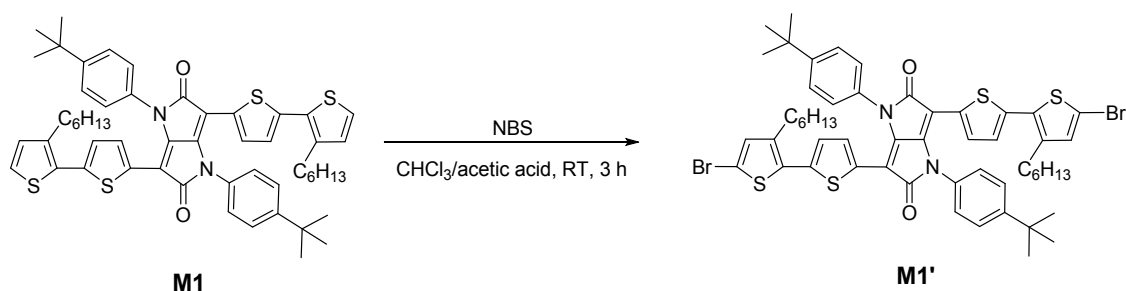

200 mg (1 eq, 0,22 mmol) **M1** were dissolved in 100 mL  $\text{CHCl}_3/\text{AcOH}$  (1:1 v/v), stirred at room temperature for 10 min, and cooled to 0 °C. Then 83 mg (2,1 eq, 0,46 mmol) NBS were added in small portions within 30 min. After stirring for 3 h the reaction was quenched with 20 mL water, and diluted with 30 mL DCM. Then the organic layer was washed once with 5 % aqueous  $\text{NaHCO}_3$ , and three times with saturated  $\text{NaCl}$  solution, and dried over  $\text{MgSO}_4$ . Then the solvent was removed under reduced pressure. The residue was purified upon precipitation from methanol. 201 mg (86 %) of a bordeaux-red powder of **M1'** were obtained.

**m.p.:** 260-262 °C.

**$^1\text{H-NMR}$**  (300 MHz,  $\text{CDCl}_3$ )  $\delta$  (ppm): 7,48-7,46 (d, l-4H); 7,28-7,26 (d, k-4H); 6,84 (s, h-2H); 6,68-6,67 (d, i-2H); 6,34-6,33 (d, j-2H); 2,63-2,54 (t, e-4H); 1,56 (m, d-4H); 1,35-1,27 (m, a,c-30H); 0,88 (t, b-6H).

**Analysis** for  $\text{C}_{54}\text{H}_{58}\text{Br}_2\text{N}_2\text{O}_2\text{S}_4$  (1055.1 g/mol):calc.. C, 61,47; H, 5,54; N, 2,66; found:C, 61,68; H, 5,56; N, 2,62.**UV/Vis** [nm]: 333, 485 (DCM); 350, 524 (film). **PL** [nm]: 646 (DCM);  $\lambda_{\text{exc}} = 450$ .

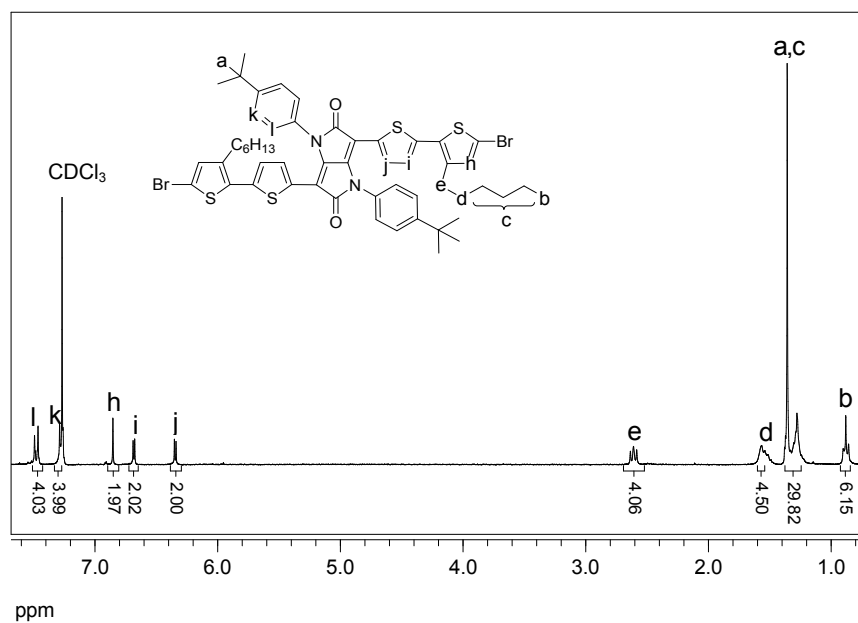

Fig. S2: <sup>1</sup>H-NMR-spectrum of **M1a** in CDCl<sub>3</sub>.

## Synthesis of P1'

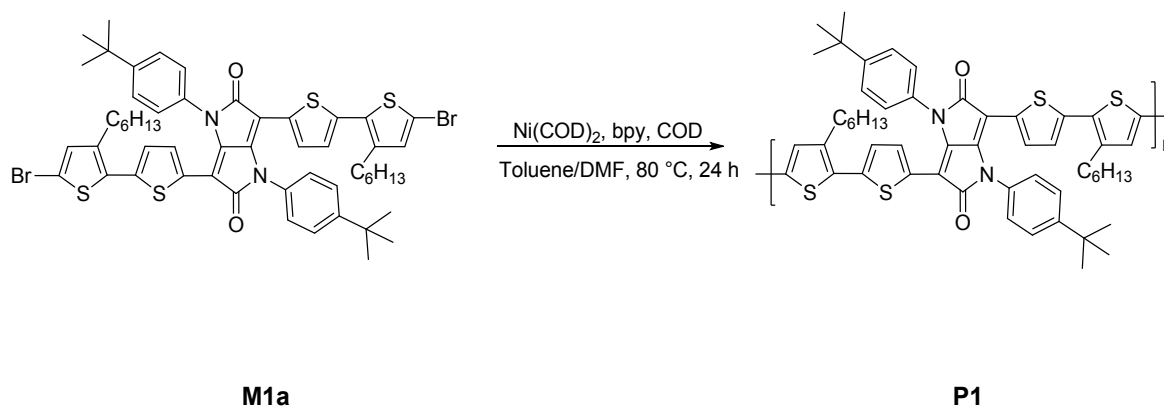

100 mg (0,95 mmol) **M1a** were dissolved in 3 ml toluene. In a separate Schlenk flask, 260 mg (0,73 mmol) bis(1,5-cyclooctadien)nickel(0), 114 mg (0.73 mmol) 2,2'-bipyridine and 1,4 mL cyclooctadiene(COD) were dissolved in 2,5 ml DMF. Then the catalyst mixture was stirred at 80 °C for 30 min, treated with the monomer solution, and stirred at 80 °C for 48 h. After cooling to room temperature, the reaction mixture was poured in a 1:1 mixture of methanol/1 M aqueous HCl, stirred at room temperature for 2 h and treated with 100 ml DCM. Then 100 ml Milli-Q-water were added. The organic phase was separated, washed three times with Milli-Q-water, another three times with an aqueous EDTA-solution (5 %), and dried over MgSO<sub>4</sub>. Then the solvent was removed in vacuo. The solid residue was dissolved in 2 mL DCM and precipitated in 100 ml MeOH. The precipitate was filtered off and dried in vacuo. 23 mg (28 %) of abordeaux-red powder of P1' were obtained. **GPC** (THF, 45 °C): M<sub>w</sub> = 17,4 kg/mol, M<sub>n</sub> = 8,4 kg/mol, PD = 2,07.

**<sup>1</sup>H-NMR** (300 MHz, CDCl<sub>3</sub>) δ (ppm): 7,48 (bs, l-4H); 6,90-6,33 (m, k,l,j,h-10H); 2,66 (bs, e-4H); 1,60 (bs, d-4H); 1,36-1.25 (m, a,c-30H); 0,87 (bs, b-6H). **UV/Vis** [nm]: 477 (toluene), 491 (film). ε(477) [L mol<sup>-1</sup> · cm]: 18356. **PL** [nm]: 667 (toluene); λ<sub>exc</sub> = 450, PL quantum yield Φ [%]: 0,7 (toluene)

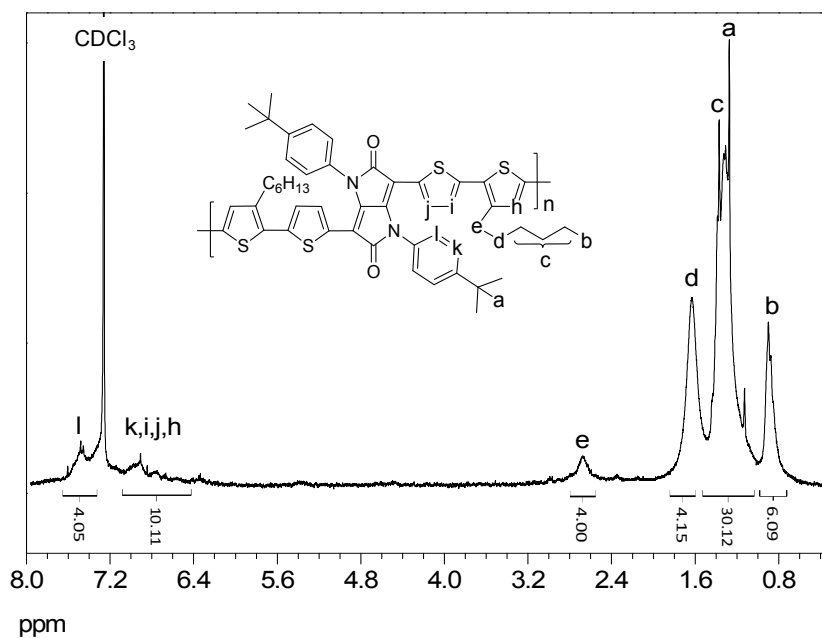

**Figure S2:** <sup>1</sup>H-NMR spectrum of P1' in CDCl<sub>3</sub>.

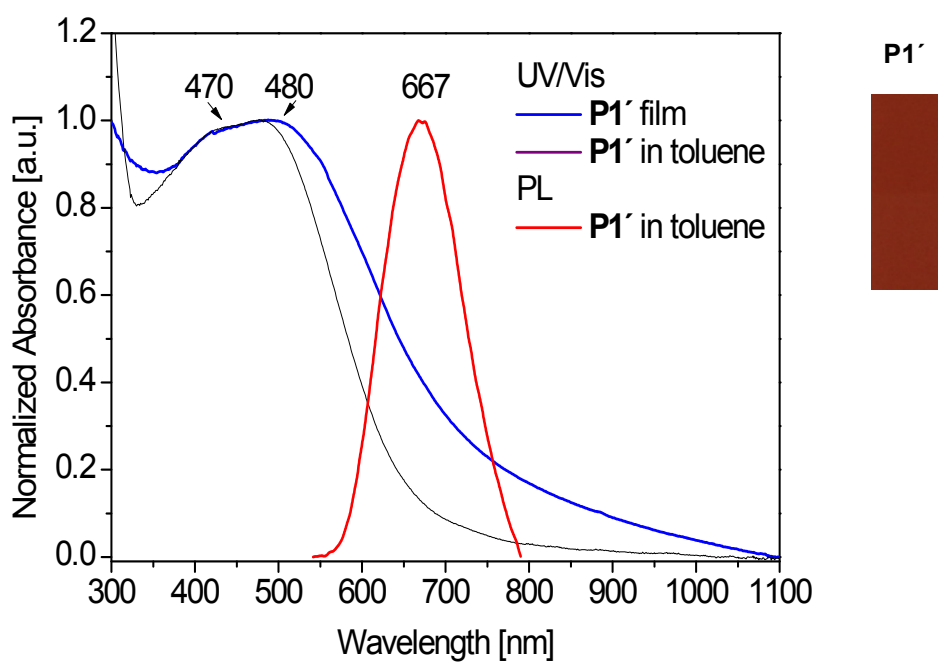

**Figure S3:** UV/Vis absorption and emission spectra of **P1'** in toluene and as film, and color of polymer solution in toluene.

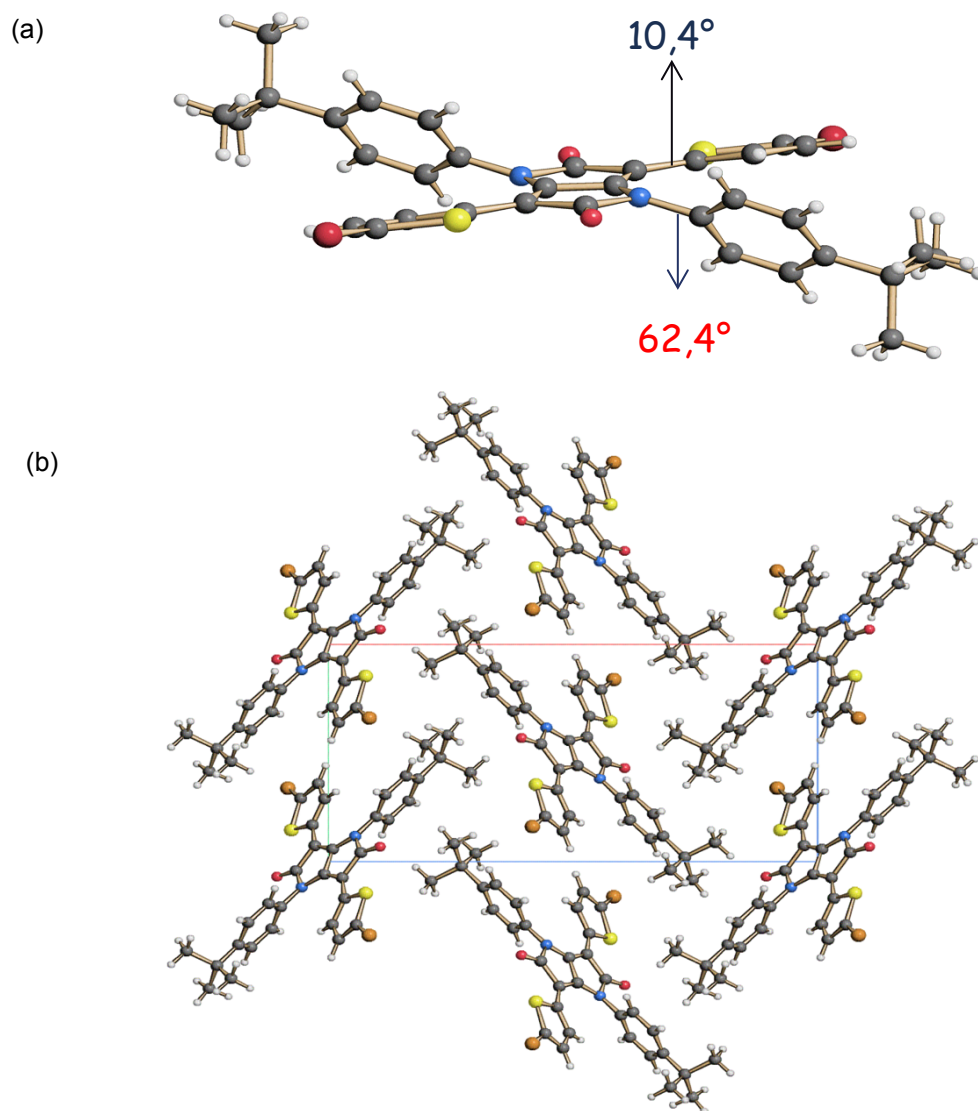

**Figure S4:** Crystal structure of **1a**. Molecular conformation in crystal lattice (a) and projection along c-axis (b). The N-, S-, O-, C-, Br-, H-atoms are shown in blue, yellow, red, grey, brown and white colour.

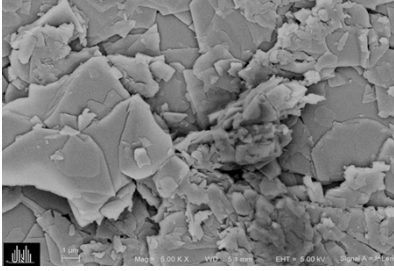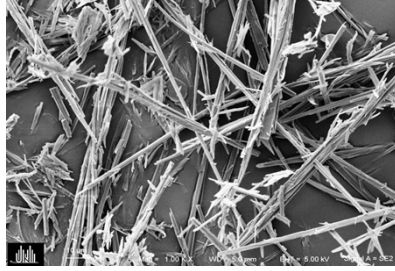

**Figure S5:** SEM images of monomers **M1** and **M2**.



**Table S4:** Crystal data and structure refinement of **1a**

Identification code iwel54\_benzol  
Empirical formula  $C_{34} H_{30} Br_2 N_2 O_2 S_2$   
Formula weight 722.54  
Temperature 100(2) K  
Wavelength 0.71073 Å  
Crystal system Monoclinic  
Space group P21/c  
Unit cell dimensions  $a = 6.8071(6)$  Å  $\alpha = 90^\circ$ .  
 $b = 21.415(2)$  Å  $\beta = 102.159(3)^\circ$ .  
 $c = 10.9248(10)$  Å  $\gamma = 90^\circ$ .  
Volume  $1556.9(2)$  Å<sup>3</sup>  
Z 2  
Density (calculated) 1.541 g/cm<sup>3</sup>  
Absorption coefficient  $2.772$  mm<sup>-1</sup>  
F(000)732  
Crystal size .2 x .03 x .03 mm<sup>3</sup>  
Theta range for data collection 1.90 to 26.99°.  
Index ranges  $-8 \leq h \leq 8$ ,  $-25 \leq k \leq 27$ ,  $-10 \leq l \leq 13$   
Reflections collected 7775  
Independent reflections 3234 [R(int) = 0.0768]  
Completeness to theta = 26.99° 95.2 %  
Absorption correction None  
Refinement method Full-matrix least-squares on F<sup>2</sup>  
Data / restraints / parameters 3234 / 0 / 193  
Goodness-of-fit on F2 1.081  
Final R indices [ $I > 2\sigma(I)$ ] R1 = 0.0453, wR2 = 0.1102  
R indices (all data) R1 = 0.0741, wR2 = 0.1309  
Largest diff. peak and hole 0.891 and -0.551 e.Å<sup>-3</sup>
